# Supplementary material for: SUMMIT-FA: A new resource for improved transcriptome imputation using functional annotations
Source: bioRxiv or medRxiv preprint supplement (doi:10.1101/2023.02.02.23285208), 2023-02-06
Supplement: Supplementary file [file media-1.pdf]

## Supplementary Material

SUMMIT-FA: A new resource for improved transcriptome  
imputation using functional annotations

| <b>Phenotypes Analyzed by SUMMIT-FA</b> |                         |                              |
|-----------------------------------------|-------------------------|------------------------------|
| Asthma                                  | Hypertension            | Schizophrenia                |
| Coronary Artery Disease                 | Hyperparathyroidism     | Systemic Lupus Erythematosus |
| Diastolic Pressure                      | Irritable Bowel Disease | Systolic Pressure            |
| Deep Vein Thrombosis                    | Insomnia                | Type-I Diabetes              |
| Eosinophil Count                        | Lymphocyte Count        | Type-II Diabetes             |
| Eczema                                  | Monocyte Count          | Triglycerides                |
| Gout                                    | Psoriasis               | Ulcerative Colitis           |
| High Cholesterol                        | Rheumatoid Arthritis    | Waist Circumference          |

Table 1: **24 phenotypes used in TWAS analysis.**

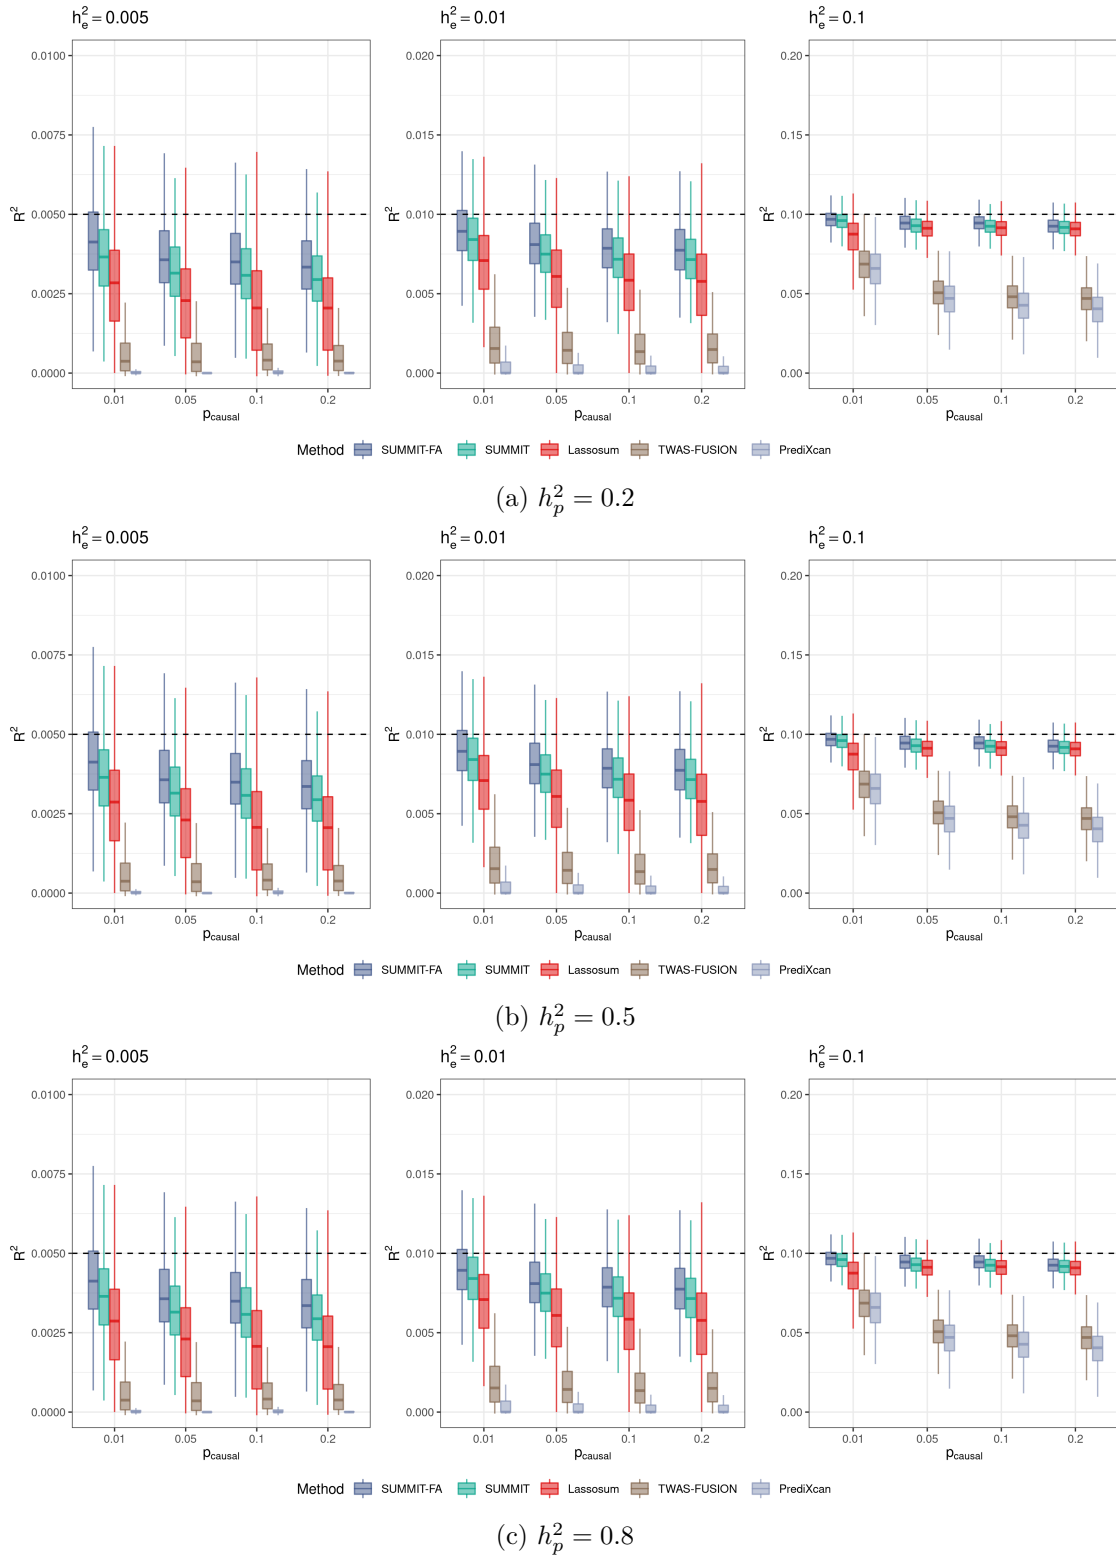

Figure 1: **Simulation performance comparison based on gene *CHURC1*.** Plots of imputation  $R^2$  in test samples by SUMMIT-FA, SUMMIT, Lassosum, TWAS-FUSION, and PrediXcan for varied proportion of causal SNPs  $p_{\text{causal}}$ , DNAm heritability  $h_e^2$ , and phenotypic heritability  $h_p^2$ .

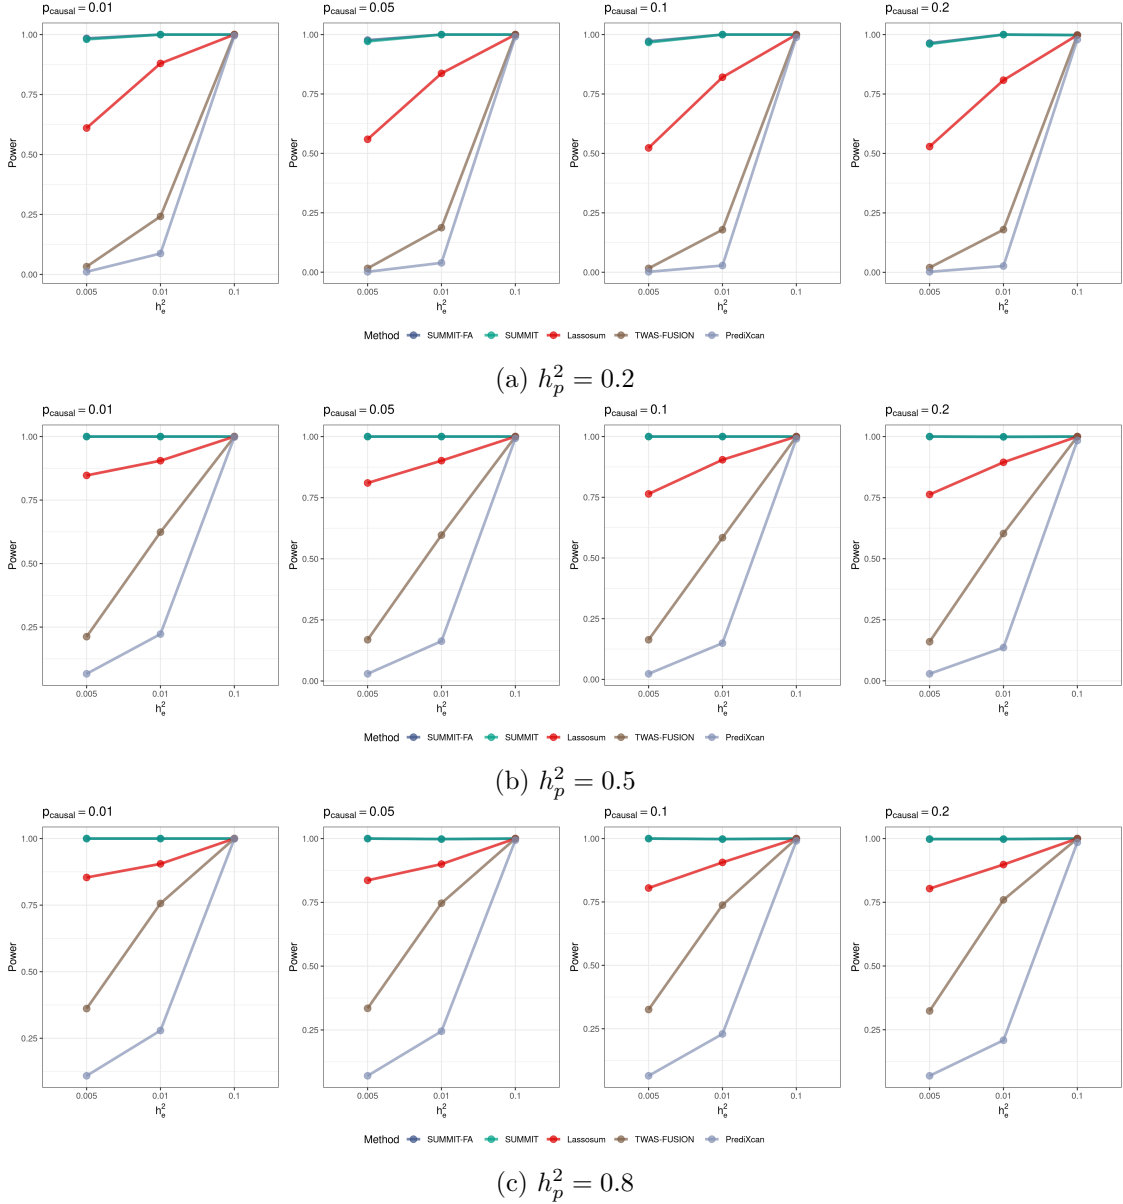

Figure 2: **Simulation performance comparison based on gene *CHURC1*.** Plots of statistical power for SUMMIT-FA, SUMMIT, Lassosum, TWAS-FUSION, and PrediXcan for varied proportion of causal SNPs  $p_{\text{causal}}$ , DNAm heritability  $h_e^2$ , and phenotypic heritability  $h_p^2$ . Empirical power was determined by the proportion of p-values  $< 2.5 \times 10^{-6}$ .

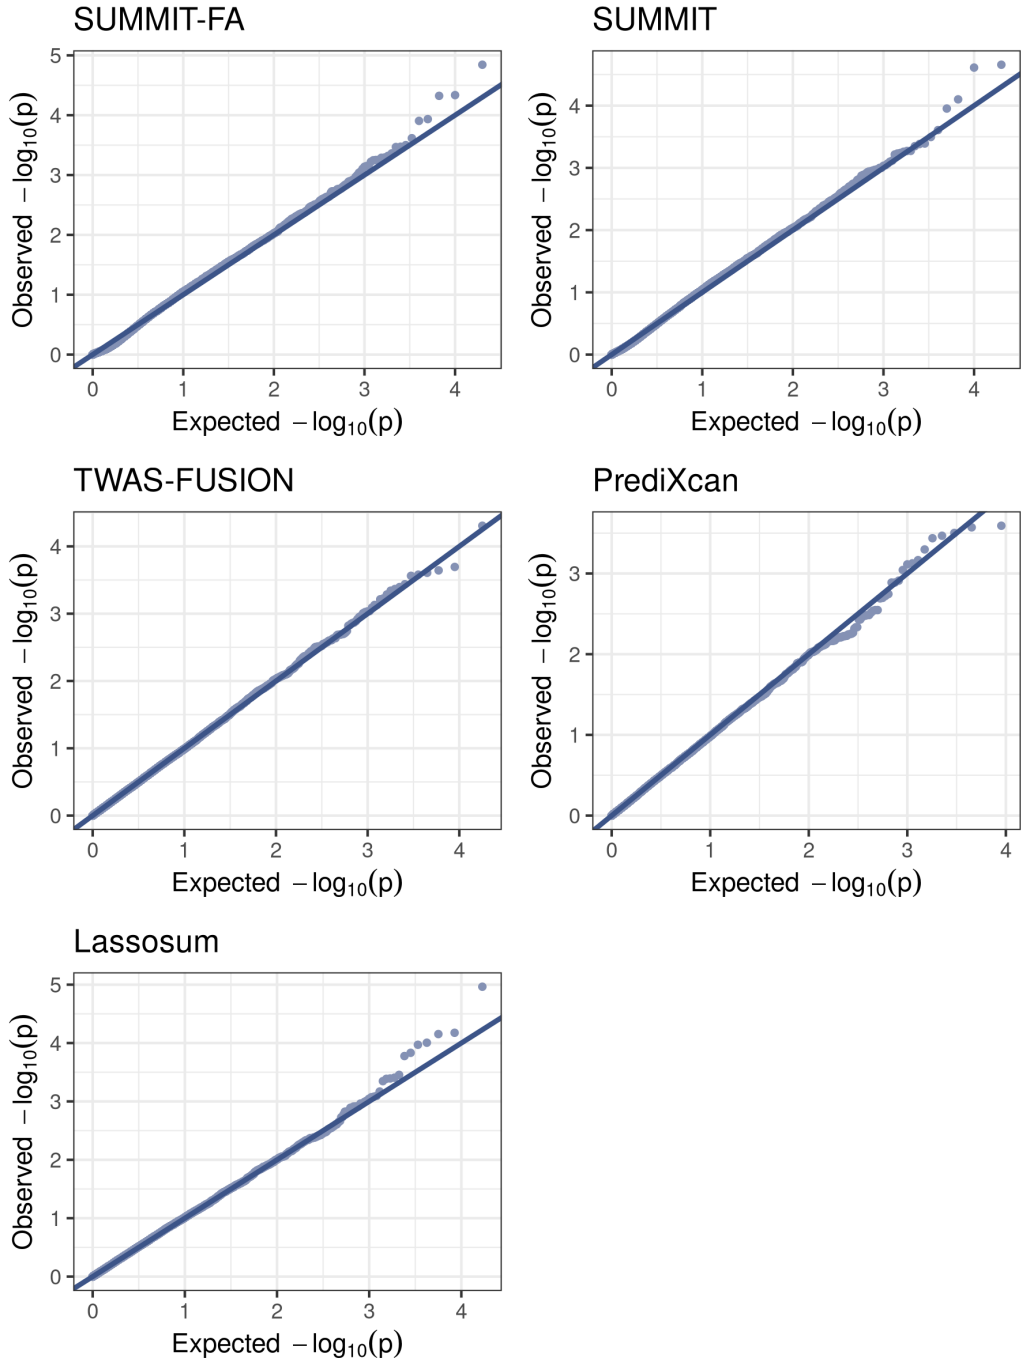

Figure 3: **QQ plots of p-values under  $H_0$**  based on the *CHURC1* gene. 20,000 replicates were run under the null hypothesis to examine type I error rates, with  $h_p^2 = 0.2$ ,  $h_e^2 = 0.005$ ,  $p_{\text{causal}} = 0.05$ .

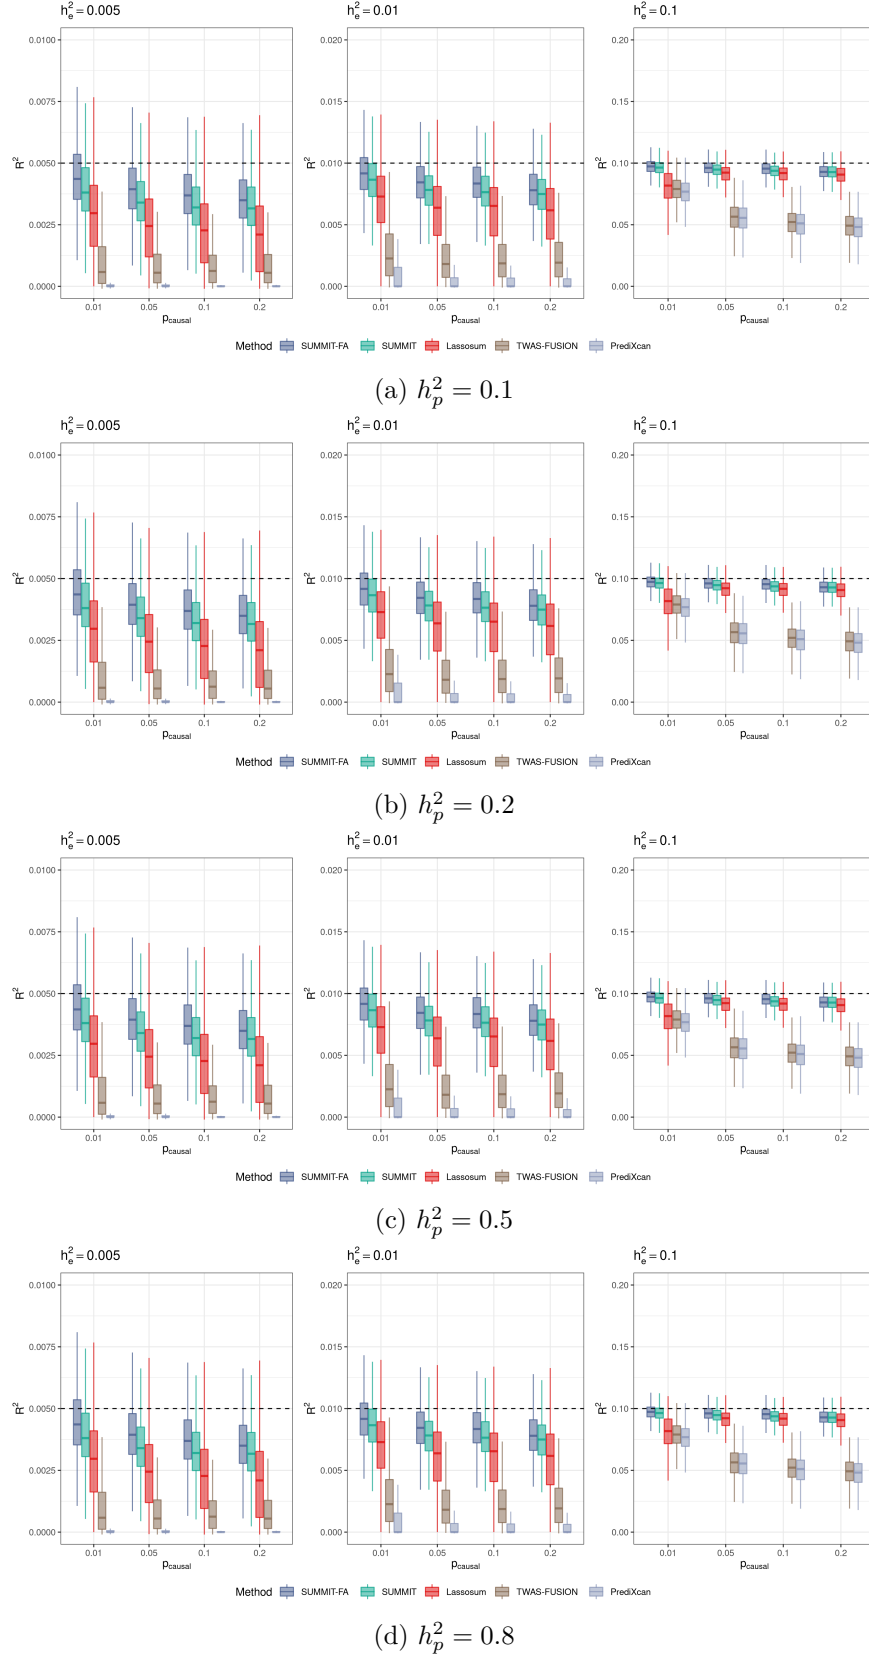

Figure 4: **Simulation performance comparison based on gene *KRIT1*.** Plots of imputation  $R^2$  in test samples by SUMMIT-FA, SUMMIT, Lassosum, TWAS-FUSION, and PrediXcan for varied proportion of causal SNPs  $p_{\text{causal}}$ , DNAm heritability  $h_e^2$ , and phenotypic heritability  $h_p^2$ .

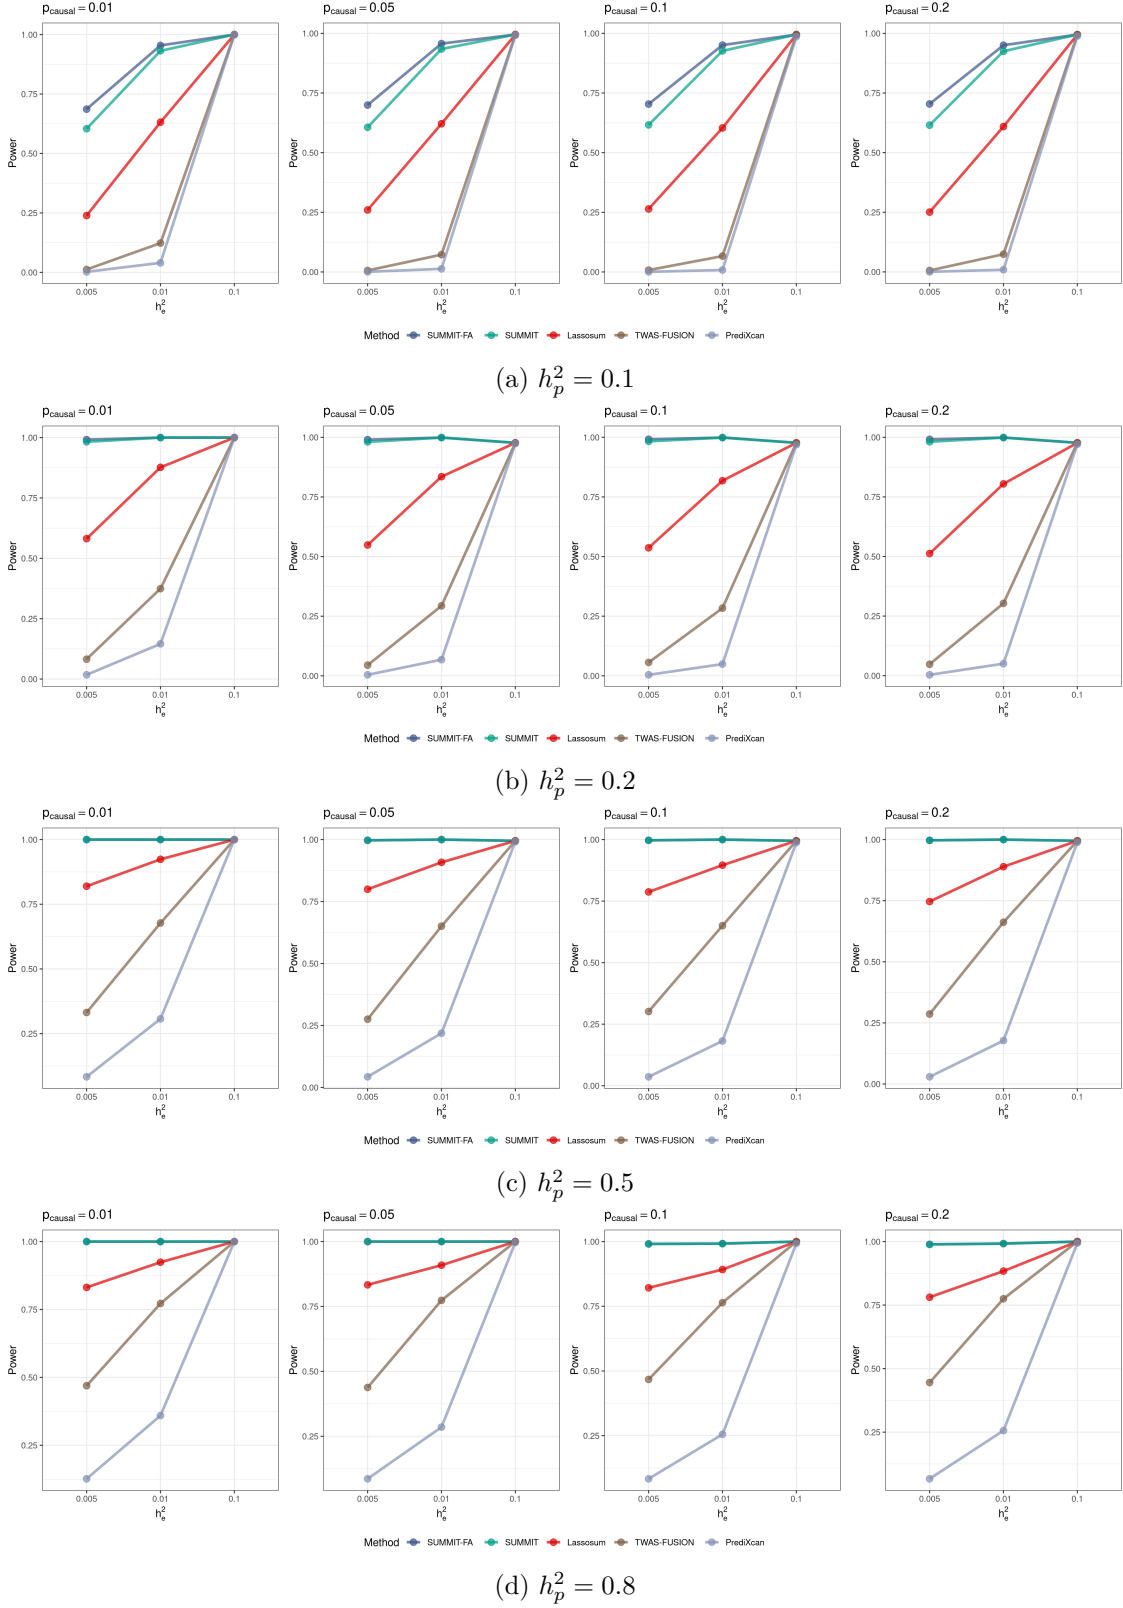

Figure 5: **Simulation performance comparison based on gene *KRIT1*.** Plots of statistical power for SUMMIT-FA, SUMMIT, Lassosum, TWAS-FUSION, and PrediXcan for varied proportion of causal SNPs  $p_{\text{causal}}$ , DNAm heritability  $h_e^2$ , and phenotypic heritability  $h_p^2$ . Empirical power was determined by the proportion of p-values  $< 2.5 \times 10^{-6}$ .
